# Supplementary material for: Long-Term Toxicity of 213Bi-Labelled BSA in Mice
Source: PubMed Central journal article supplement (PMC4794211; doi:10.1371/journal.pone.0151330), 2016-03-16
Supplement: pone.0151330.s001.pdf [file pone.0151330.s001.pdf]

## Supplemental data 1: Number of animals used in each experiment

|                       | Biodistribution and dosimetry  | Weight and survival follow-up                             | Haematological toxicity evaluation                        | Hepatic and renal toxicity evaluation                     | Histology                                                                                                                                       |
|-----------------------|--------------------------------|-----------------------------------------------------------|-----------------------------------------------------------|-----------------------------------------------------------|-------------------------------------------------------------------------------------------------------------------------------------------------|
| <sup>125</sup> I-BSA  | n=12 (3 mice at 4 time points) |                                                           |                                                           |                                                           |                                                                                                                                                 |
| <sup>215</sup> Bi-BSA | n=12 (3 mice at 4 time points) | PBS, n=5<br>3.7 MBq, n=5<br>7.4 MBq, n=7<br>11.1 MBq, n=5 | PBS, n=5<br>3.7 MBq, n=5<br>7.4 MBq, n=7<br>11.1 MBq, n=5 | PBS, n=5<br>3.7 MBq, n=5<br>7.4 MBq, n=7<br>11.1 MBq, n=5 | PBS, n=5<br>3.7 MBq, n=3<br>7.4 MBq, n=4<br>11.1 MBq, n=2                                                                                       |
| <sup>213</sup> Bi-BSA |                                |                                                           |                                                           |                                                           | <b>26 W post injection:</b><br>Control, n=3<br>11.1 MBq, n=4<br><br><b>35 W post injection:</b><br>Control, n=2<br>3.7 MBq, n=3<br>7.4 MBq, n=4 |
